# Supplementary material
Source: MDPI journal article supplement (https://www.mdpi.com/2673-401X/3/4/33)
Supplement: s1 [file s1]

## Supporting Information

### Efficient Synthesis of a 2-Decyl-tetradecyl Substituted 7-Bromophenothiazine-3-carbaldehyde Building Block for Functional Dyes

**Burak Kürsat Börüsa, and Thomas J. J. Müller \***

Institut für Organische und Makromolekulare Chemie, Heinrich-Heine-Universität Düsseldorf, Universitätsstraße 1, D-40225 Düsseldorf (Germany)

\* Correspondence: ThomasJJ.Mueller@uni-duesseldorf.de; Tel.: +49 211 81 12298

Burak-Kuersat.Boeruesah@uni-duesseldorf.de (B.K.B.)

#### Table of contents

|                                   |   |
|-----------------------------------|---|
| 1. NMR spectra of compound 2..... | 2 |
| 2. NMR spectra of compound 3..... | 3 |

# 1. NMR spectra of compound 2

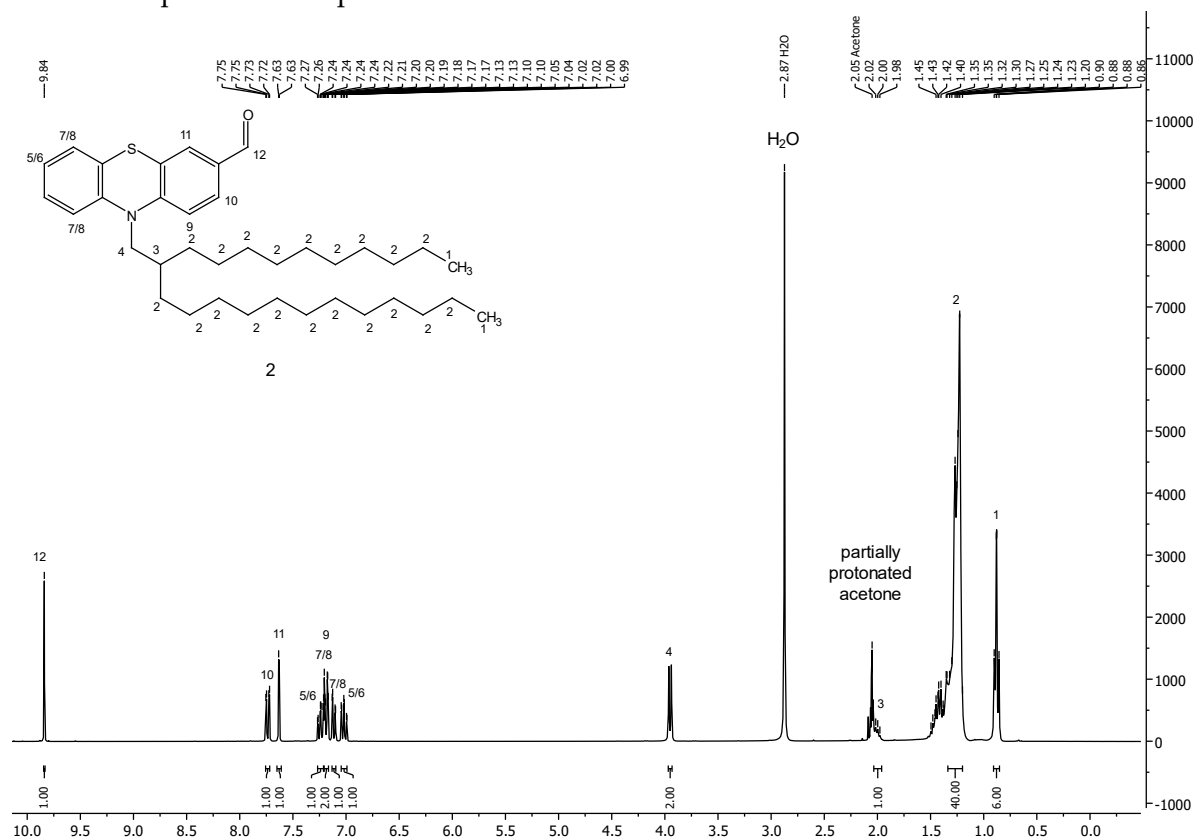

Figure S1. <sup>1</sup>H NMR spectrum of compound 2 (recorded in acetone-d<sub>6</sub> at 300 MHz, *T* = 298 K).

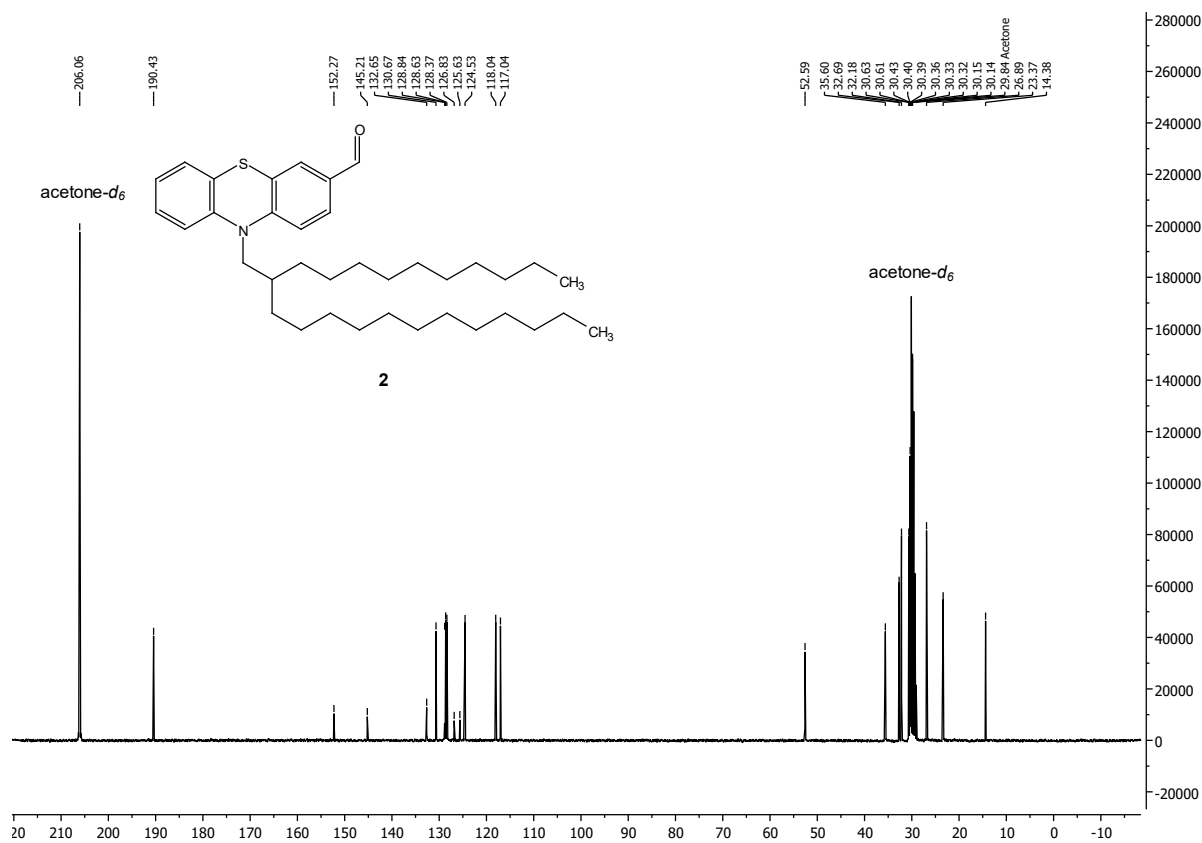

Figure S2. <sup>13</sup>C NMR spectrum of compound 2 (recorded in acetone-d<sub>6</sub> at 75 MHz, *T* = 298 K).

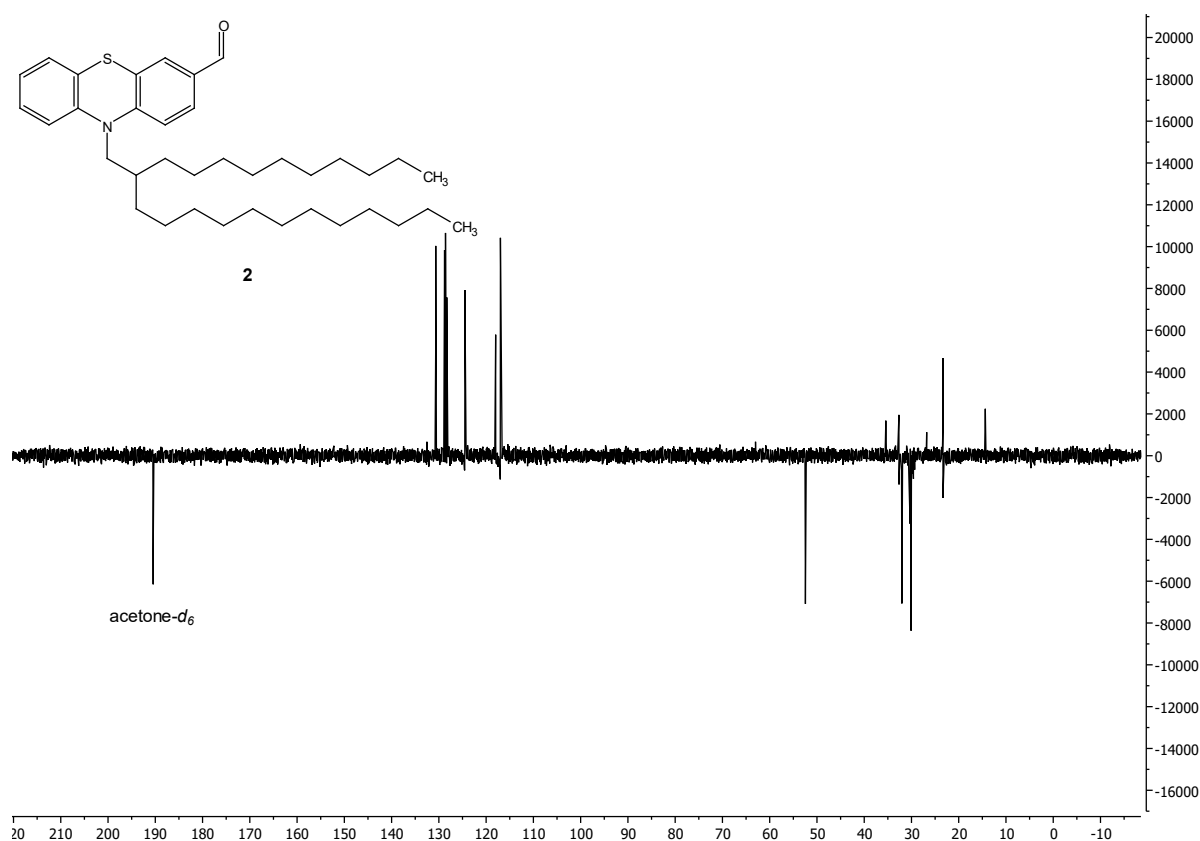

**Figure S3.** DEPT-135 NMR spectrum of compound **2** (recorded in acetone- $d_6$  at 75 MHz,  $T = 298$  K).

## 2. NMR spectra of compound 3

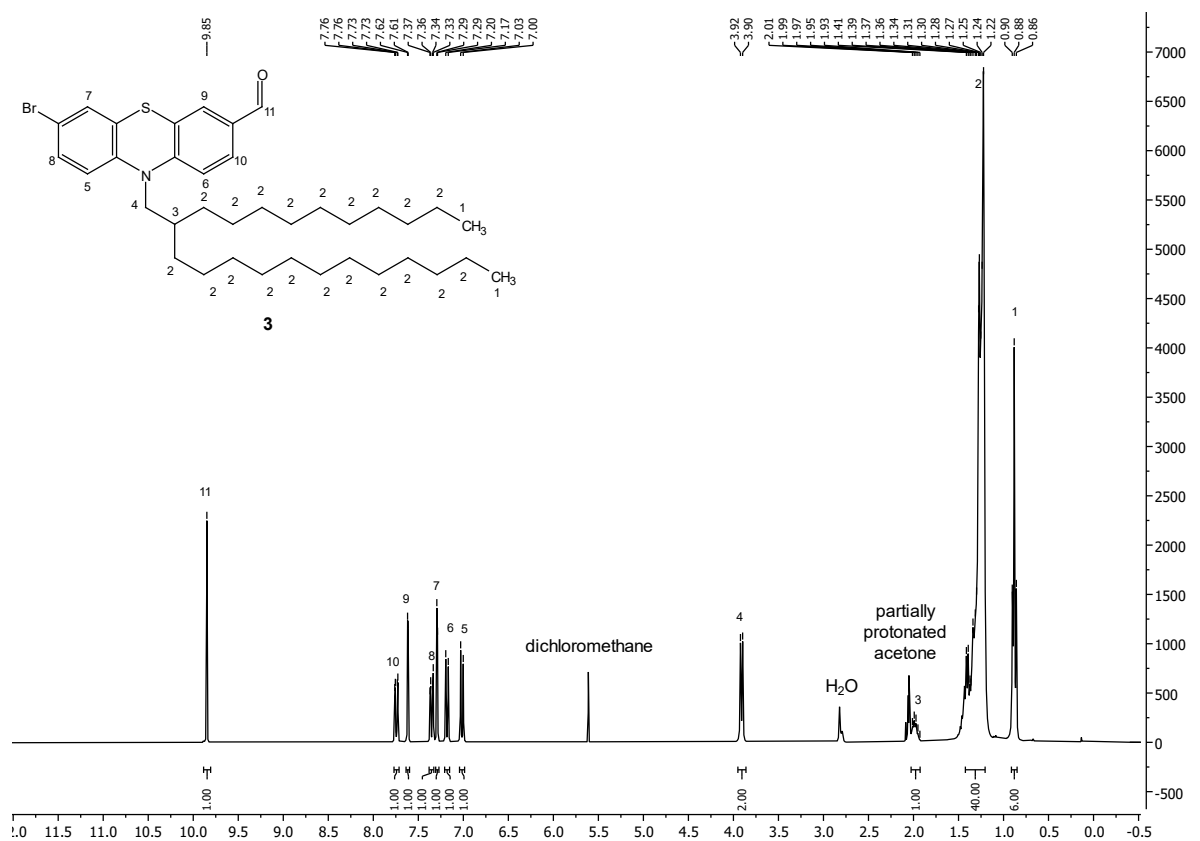

**Figure S4.**  $^1\text{H}$  NMR spectrum of compound **3** (recorded in acetone- $d_6$  at 300 MHz,  $T = 298$  K).

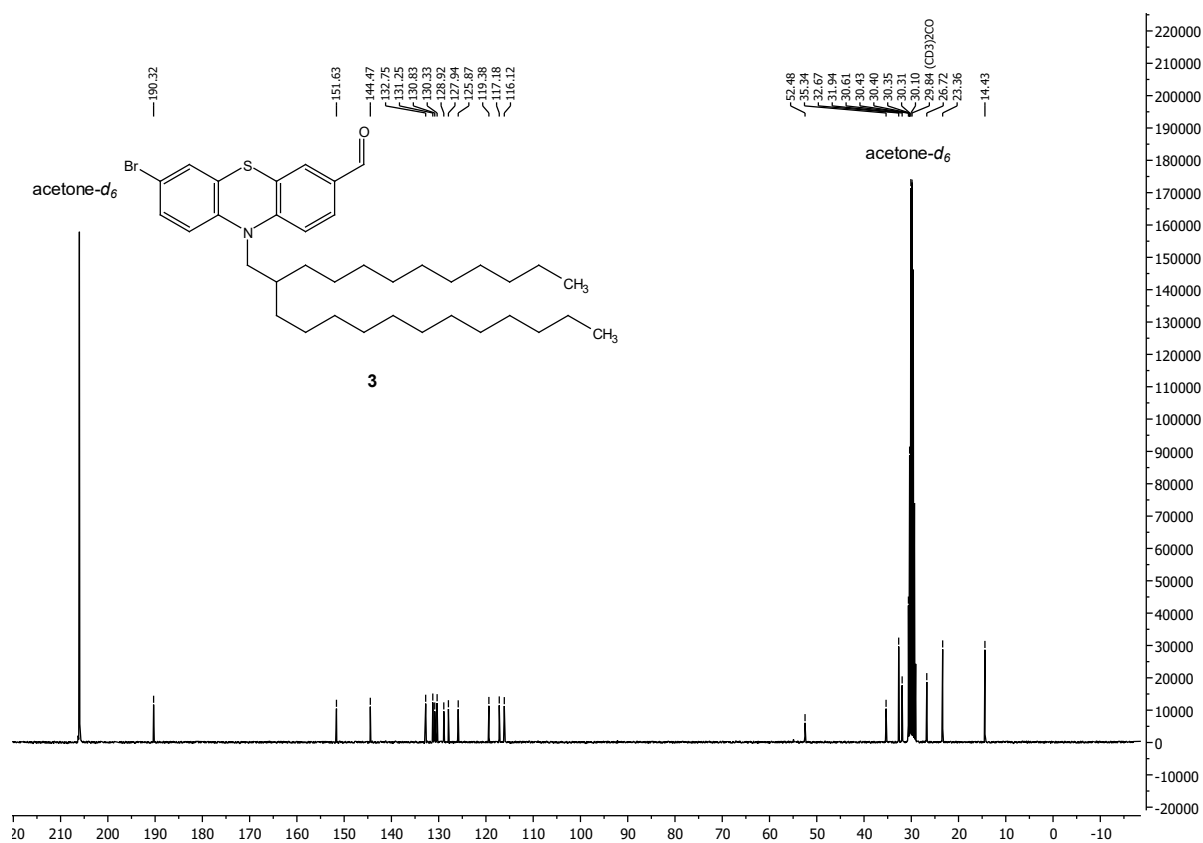

**Figure S5.** <sup>13</sup>C NMR spectrum of compound 3 (recorded in acetone-*d*<sub>6</sub> at 75 MHz, *T* = 298 K).

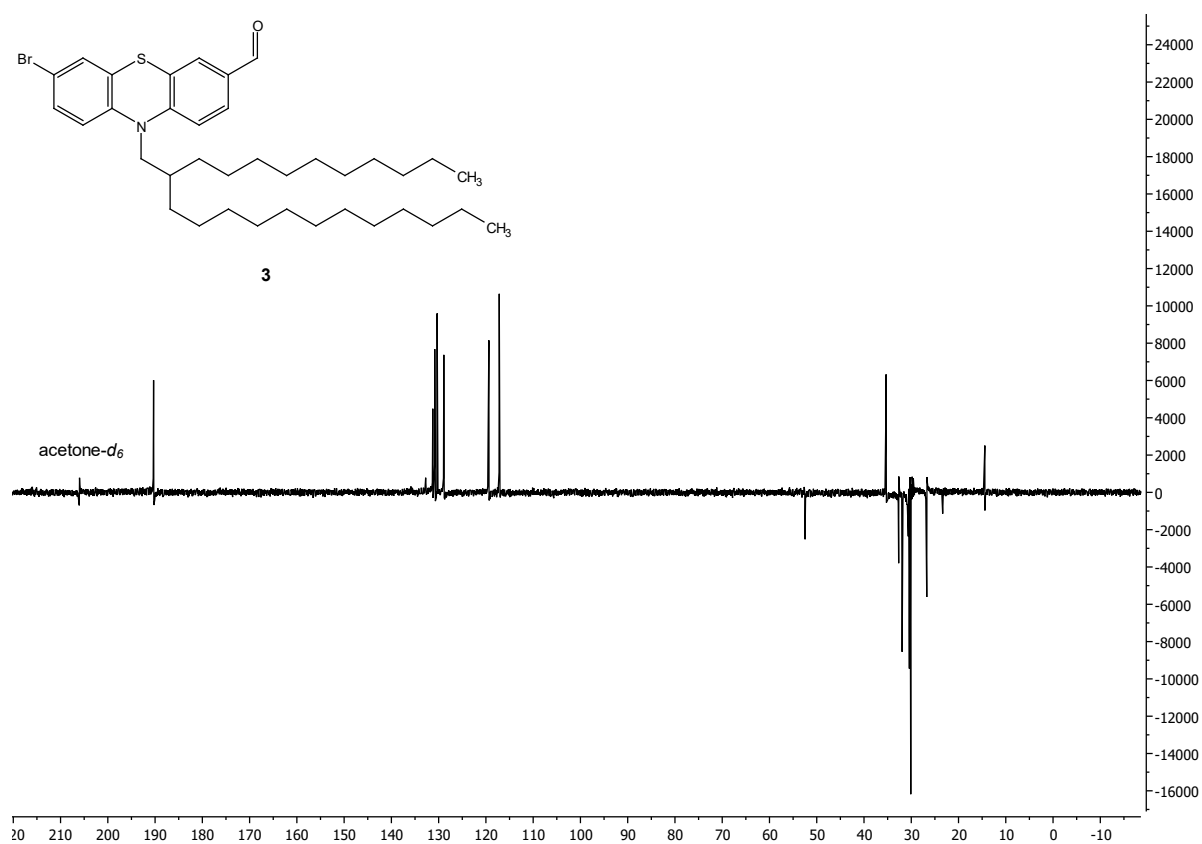

**Figure S6.** DEPT-135 NMR spectrum of compound 3 (recorded in acetone-*d*<sub>6</sub> at 75 MHz, *T* = 298 K).
